# Supplementary material for: Interleukin-10 contributes to PGE2 signalling through upregulation of EP4 via SHIP1 and STAT3
Source: PubMed Central journal article supplement (PMC7117666; doi:10.1371/journal.pone.0230427), 2020-04-02
Supplement: pone.0230427.s001.pdf [file pone.0230427.s001.pdf]

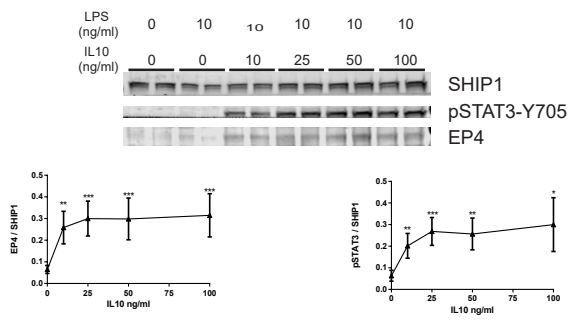

Raw Data

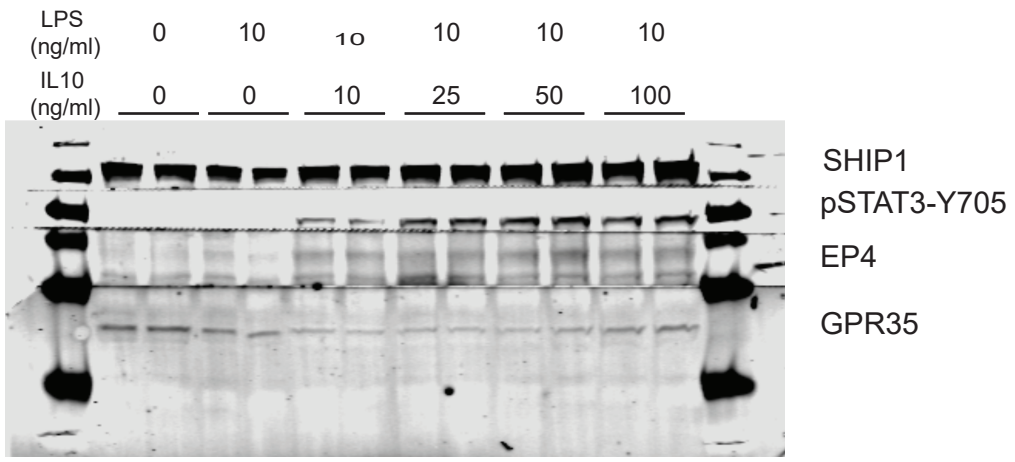

Figure 2

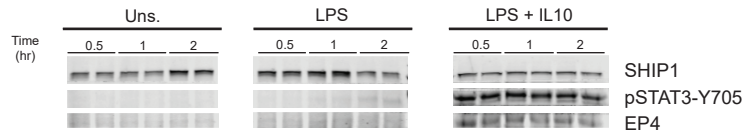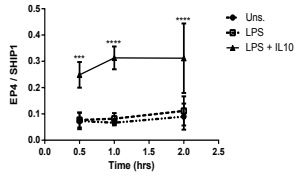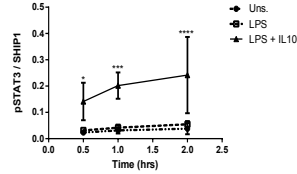

## Raw Data

Exposure 1

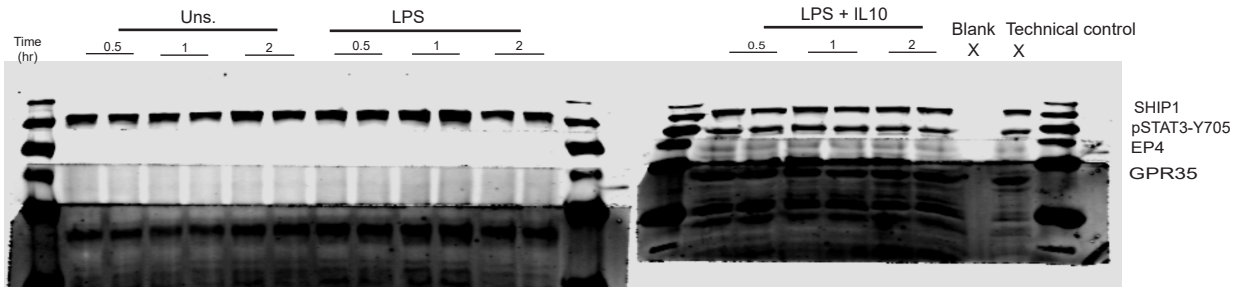

Exposure 2

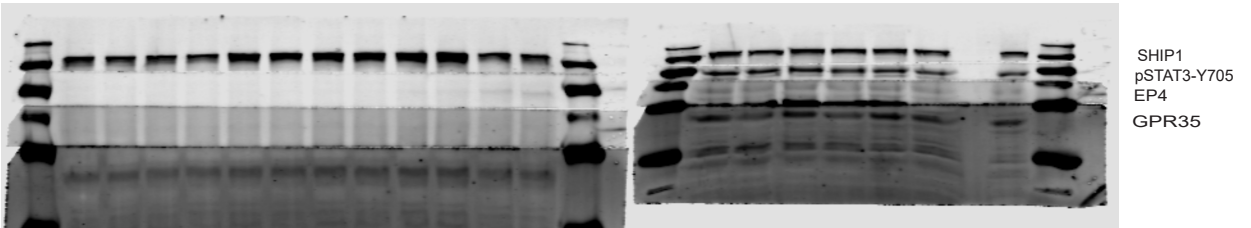

Figure 3

**(A) SHIP1 <sup>+/+</sup> and <sup>-/-</sup> perimacs**

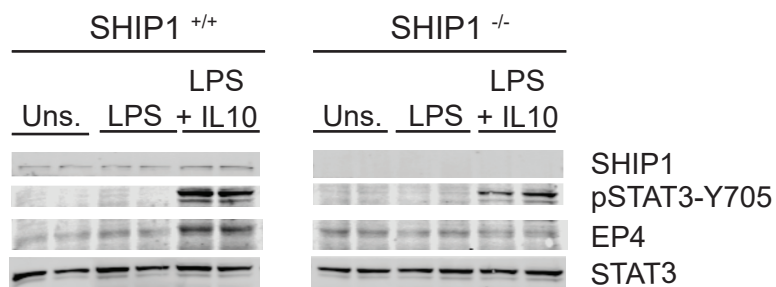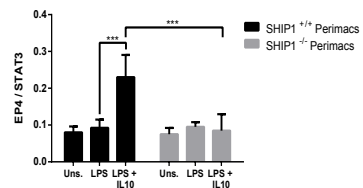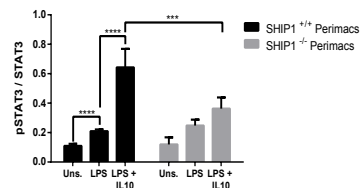

**Raw Data**

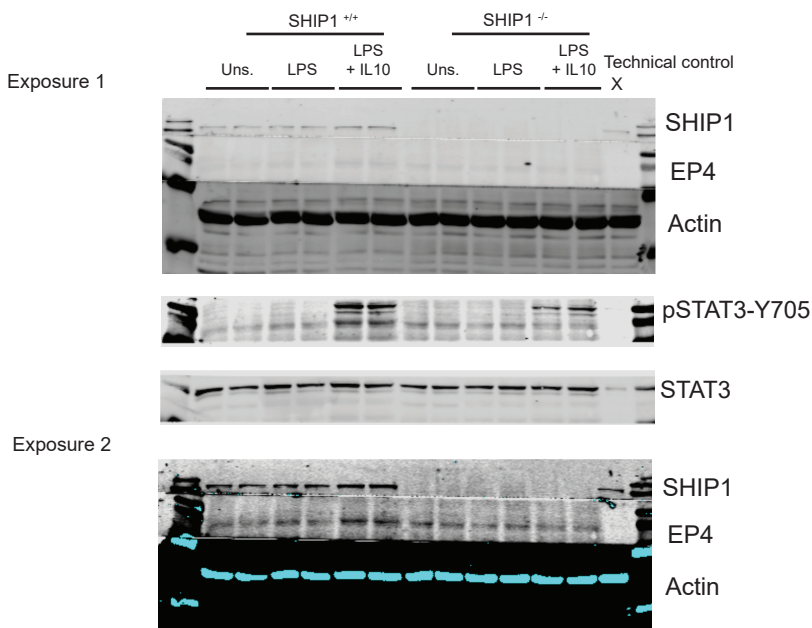

**Figure 4A**

**(B) SHIP1 <sup>+/+</sup> and <sup>-/-</sup> BMDMs**

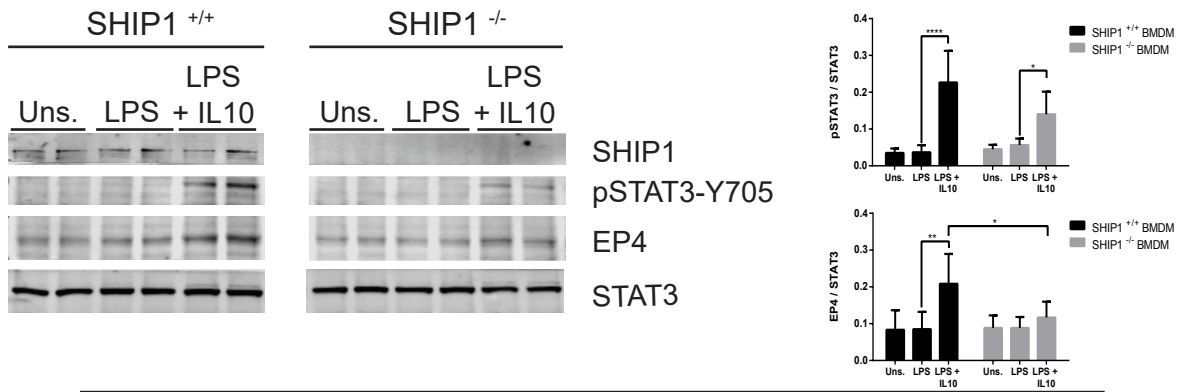

**Raw Data**

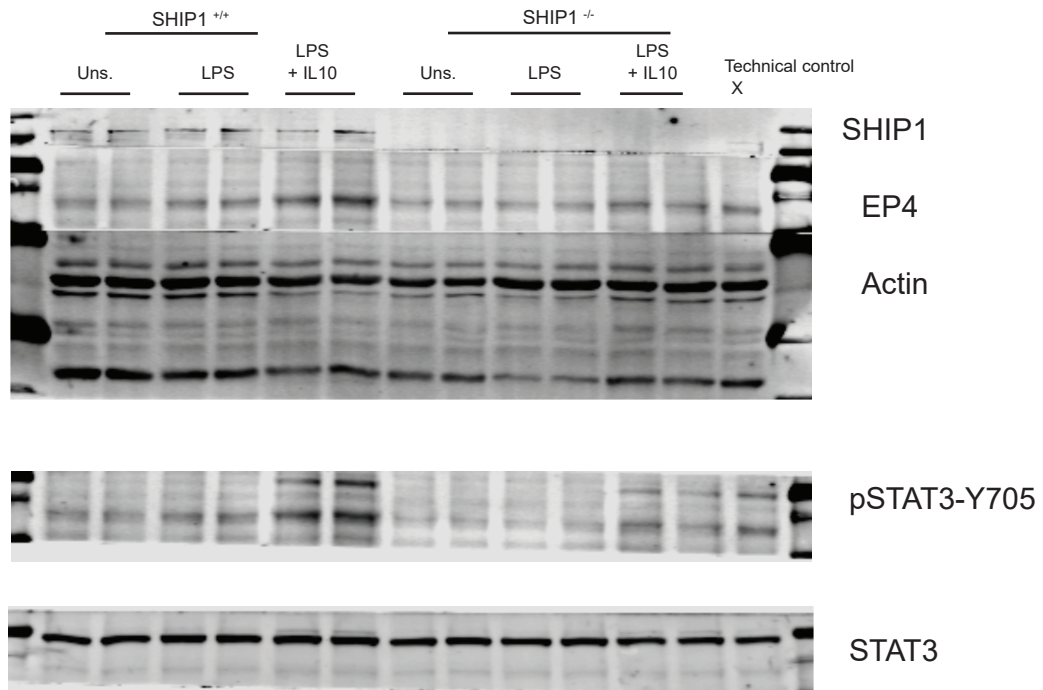

**Figure 4B**

**(C) STAT3 <sup>+/+</sup> and <sup>-/-</sup> BMDMs**

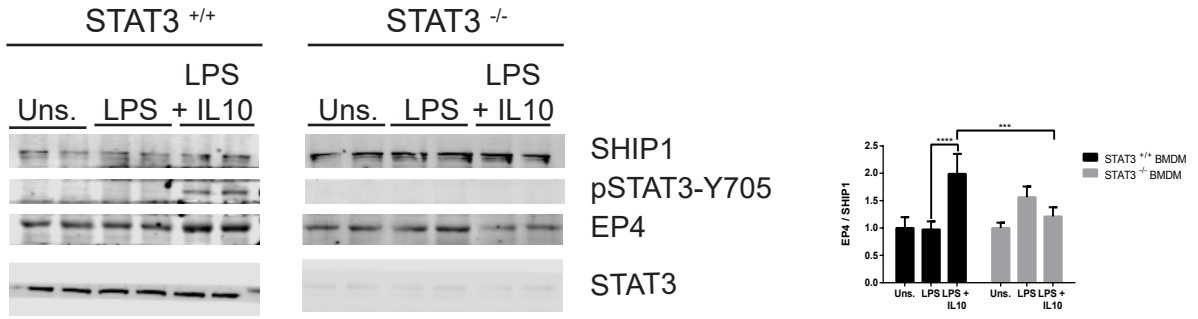

**Raw Data**

Exposure 1

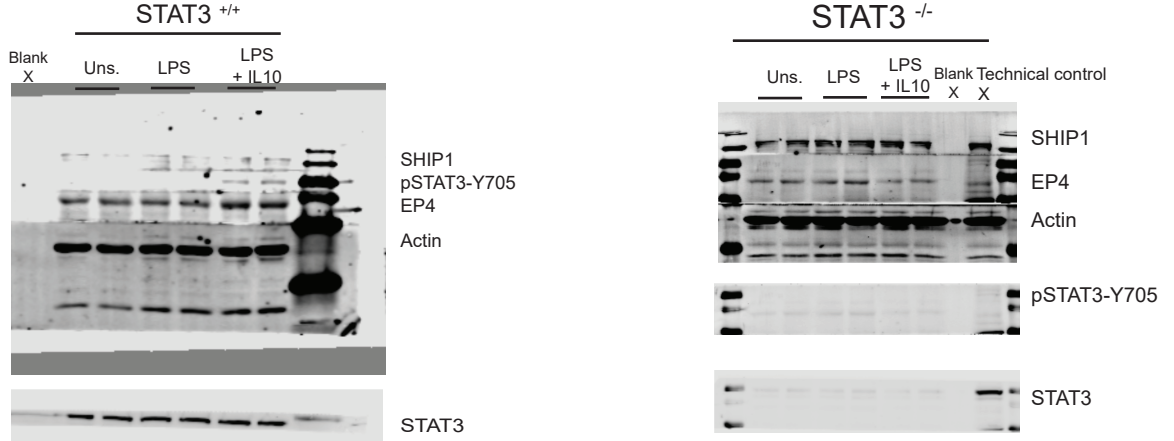

Exposure 2

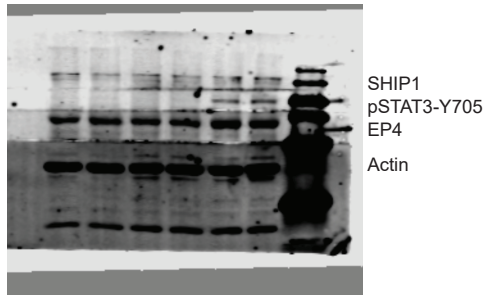

**Figure 4C**

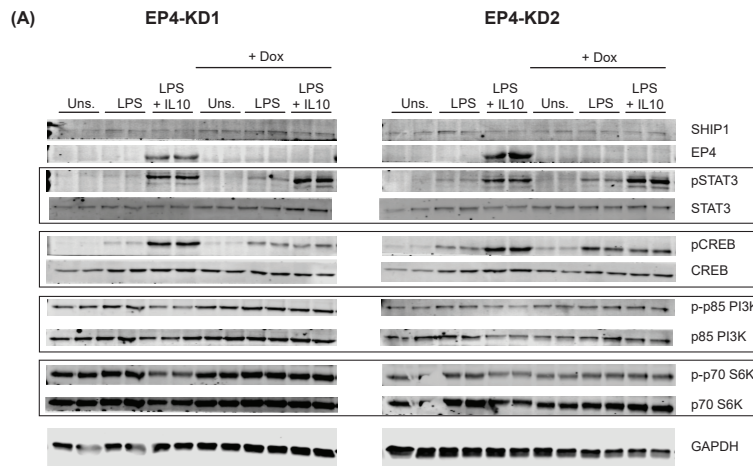

Raw Data

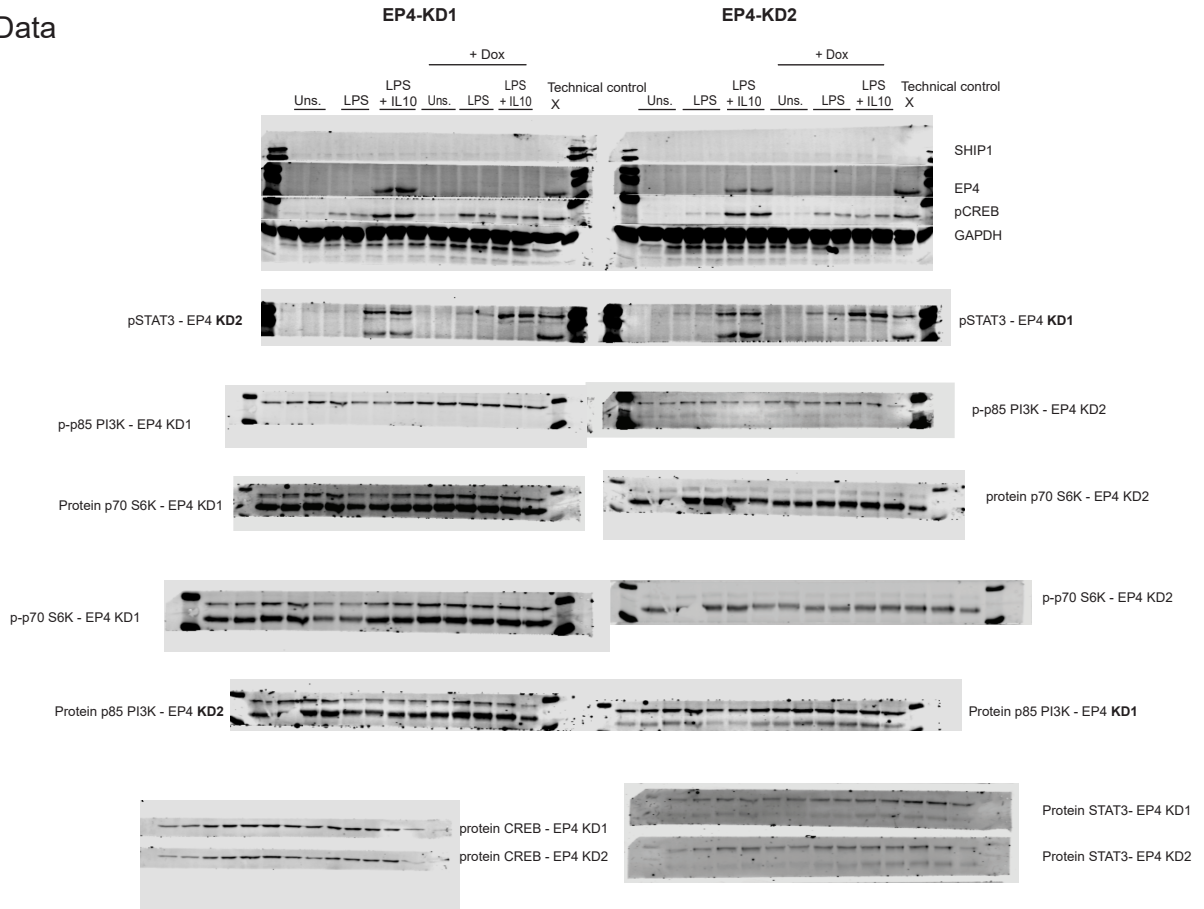

Figure 6A
